# Supplementary material
Source: PubMed Central journal article supplement (PMC3659395)
Supplement: NIHMS324390-supplement-supplement_1.pdf [file NIHMS324390-supplement-supplement_1.pdf]

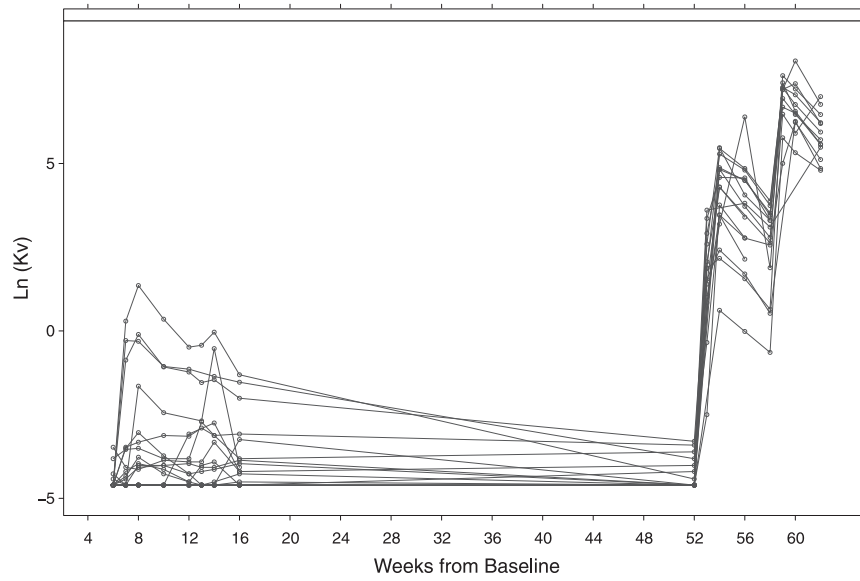

**FIG E1.** Individual antibody responses ( $\ln[K_v]$ ) to phiX174 immunization over time in rituximab-treated subjects.

**TABLE E1.** Baseline clinical characteristics (subjects who received 4 full infusions of rituximab or  $\geq 3$  placebo infusions)

|                                      | Rituximab group (n = 46) | Control group (n = 29) | Overall        |
|--------------------------------------|--------------------------|------------------------|----------------|
| Age (y), mean $\pm$ SD               | 20.1 $\pm$ 8.9           | 17.4 $\pm$ 8.0         | 19.1 $\pm$ 8.6 |
| Median age (y), min-max              | 18 (8-40)                | 14 (9-38)              | 16 (8-40)      |
| Male sex, no. (%)                    | 29 (63)                  | 17 (59)                | 46 (61)        |
| White race, no. (%)                  | 44 (96)                  | 28 (97)                | 72 (96)        |
| Non-Hispanic, no. (%)                | 43 (93)                  | 26 (90)                | 69 (92)        |
| No. of positive autoantibodies (%)*  |                          |                        |                |
| 1                                    | 9 (20)                   | 3 (10)                 | 12 (16)        |
| 2                                    | 13 (28)                  | 7 (24)                 | 20 (27)        |
| 3                                    | 13 (28)                  | 8 (28)                 | 21 (28)        |
| 4                                    | 11 (24)                  | 11 (38)                | 22 (29)        |
| Time since diagnosis (d) at baseline | 80 $\pm$ 23              | 84 $\pm$ 19            | 81 $\pm$ 22    |
| Median (d), range                    | 81 (37-137)              | 91 (34-109)            | 85 (34-137)    |

\*Four autoantibodies associated with T1D were tested: mIAA, GAD65-Ab, ICA512-Ab, and ICA.

**TABLE E2.** Actual numbers for the measurements in Table II

| Days after immunization | Primary response |               |                          | Secondary response |               |                          |
|-------------------------|------------------|---------------|--------------------------|--------------------|---------------|--------------------------|
|                         | Rituximab group  | Control group | Healthy control subjects | Rituximab group    | Control group | Healthy control subjects |
| 7                       | 20               | 15            | 52                       | 18                 | 15            | 52                       |
| 14                      | 20               | 15            | 50                       | 20                 | 13            | 51                       |
| 28                      | 19               | 15            | 52                       | 20                 | 13            | 51                       |

  

| Days after immunization | Tertiary response |               |                          | Quaternary response |               |                          |
|-------------------------|-------------------|---------------|--------------------------|---------------------|---------------|--------------------------|
|                         | Rituximab group   | Control group | Healthy control subjects | Rituximab group     | Control group | Healthy control subjects |
| 7                       | 13                | 14            | 17                       | 11                  | 13            | 0                        |
| 14                      | 16                | 15            | 18                       | 12                  | 15            | 0                        |
| 28                      | 16                | 14            | 19                       | 13                  | 15            | 0                        |
